# Supplementary material for: Dietary Nanoparticles Interact with Gluten Peptides and Alter the Intestinal Homeostasis Increasing the Risk of Celiac Disease
Source: MDPI journal article supplement (doi:10.3390/ijms22116102), 2021-06-05
Supplement: s1 [file s1]

# Dietary nanoparticles interact with gluten peptides and alter the intestinal homeostasis increasing the risk of Celiac Disease

Clara Mancuso<sup>1,2</sup>, Francesca Re<sup>1</sup>, Ilaria Rivolta<sup>1</sup>, Luca Elli<sup>3</sup>, Elisa Gnodi<sup>1</sup>, Jean-François Beaulieu<sup>2</sup>, Donatella Barisani<sup>1,\*</sup>

<sup>1</sup> School of Medicine and Surgery, University of Milano-Bicocca, 20900 Monza, Italy; [clara.mancuso@unimib.it](mailto:clara.mancuso@unimib.it), [francesca.re1@unimib.it](mailto:francesca.re1@unimib.it), [ilaria.rivolta@unimib.it](mailto:ilaria.rivolta@unimib.it), [e.gnodi@campus.unimib.it](mailto:e.gnodi@campus.unimib.it)

<sup>2</sup> Laboratory of Intestinal Physiopathology, Faculty of Medicine and Health Sciences, Université de Sherbrooke, Sherbrooke, J1H 5N4, QC, Canada; [Jean-Francois.Beaulieu@usherbrooke.ca](mailto:Jean-Francois.Beaulieu@usherbrooke.ca)

<sup>3</sup> Centre for the Prevention and Diagnosis of Celiac Disease, Gastroenterology and Endoscopy Unit, Fondazione IRCCS Ca' Granda Ospedale Maggiore Policlinico, 20122 Milan, Italy; [luca.elli@policlinico.mi.it](mailto:luca.elli@policlinico.mi.it)

\* Correspondence [donatella.barisani@unimib.it](mailto:donatella.barisani@unimib.it); Tel.: +39-02-64488304

## Supplementary Materials

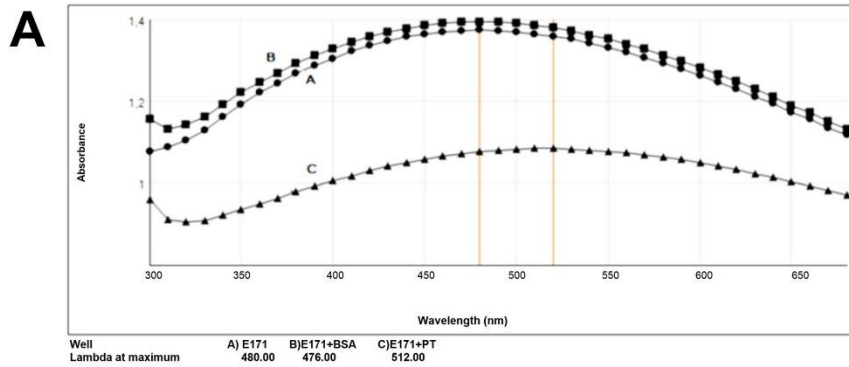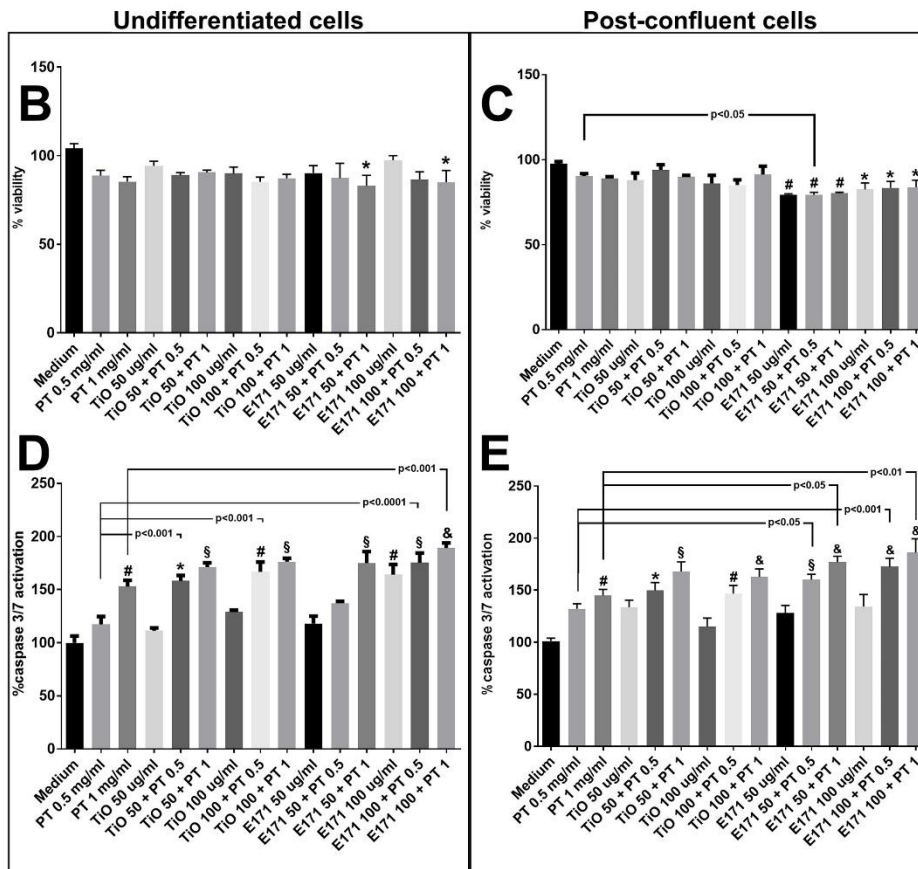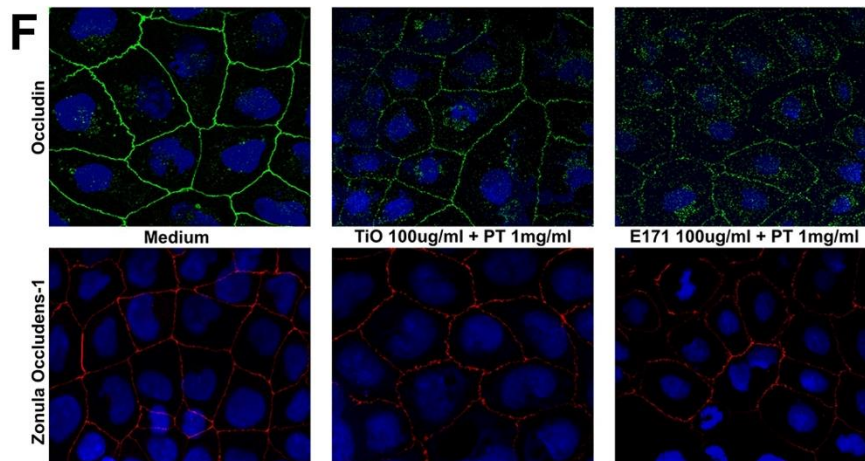

**Figure S1:** E171 vs TiO<sub>2</sub>NP. (A) UV-Vis spectra of E171; (B) MTT performed on undifferentiated Caco-2 cells; (C) MTT performed on post-confluent Caco-2 cells; (D) Apoptosis Assay on undifferentiated Caco-2 cells; (E) Apoptosis Assay on post-confluent Caco2 cells; Significance versus untreated cells is indicated above each column (\*p<0.05; #p<0.01; §p<0.001; &p<0.0001), whereas versus PT is represented by bars. Data are shown as mean value and SD. (F) OCLN and ZO-1 immunofluorescence in post-confluent Caco2 cells. We only reported images of cells treated with the combinations: TiO<sub>2</sub>NP (100ug/ml) +PT (1mg/ml) and E171 (100ug/ml) + PT (1mg/ml).

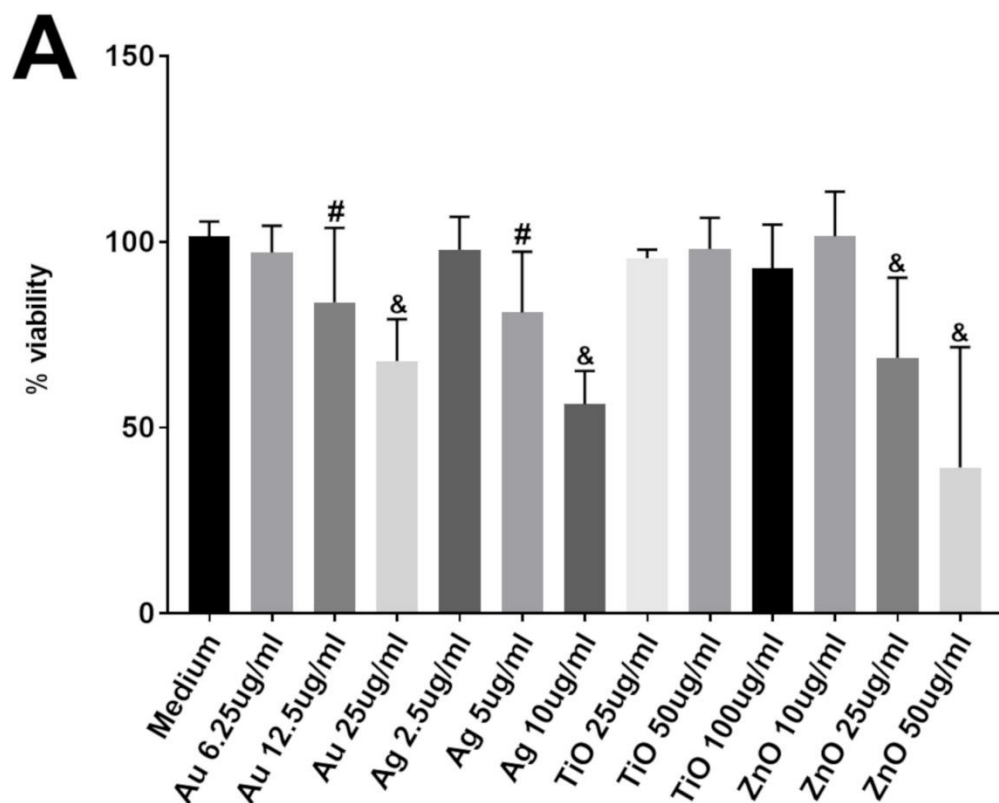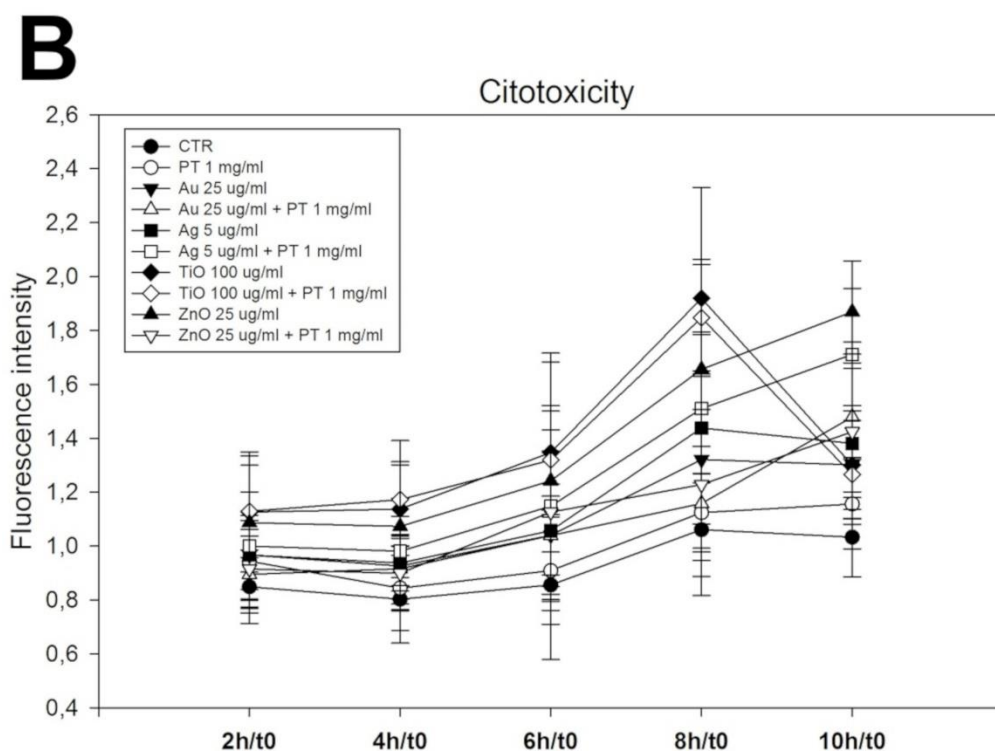

**Figure S2:** Dose response of the mNPs and time course of the various treatments in undifferentiated Caco2 cells. (A) MTT assay at 24 hours. Data are expressed as % of untreated cells (Medium). Significance versus untreated cells is indicated above each column (# $p < 0.01$ ; & $p < 0.0001$ ). (B) Time course of cytotoxicity caused by the various treatments. The fluorescence intensity represented is the one detected at the single time point minus the fluorescence at time 0.

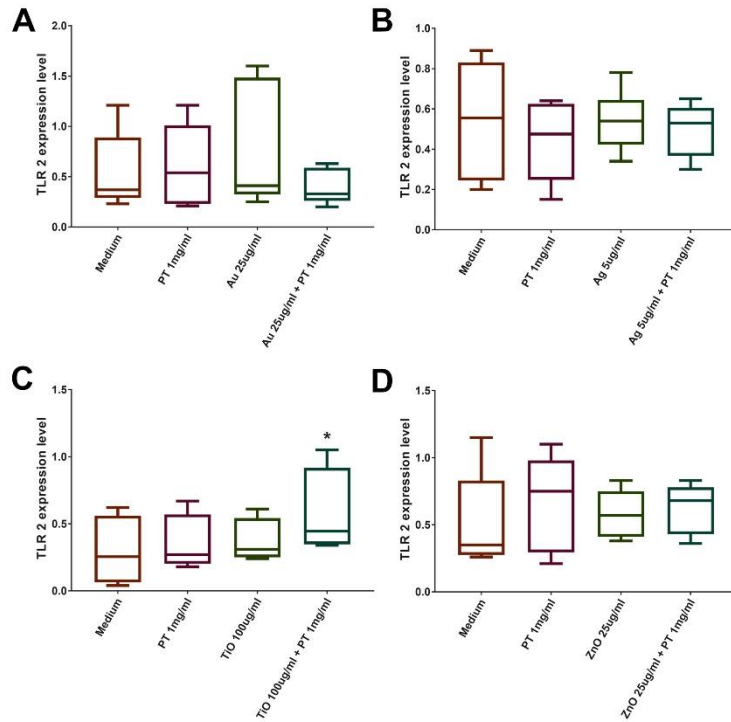

**Figure S3.** TLR2 expression in CeD patients on a GFD. Duodenal biopsies stimulated 4h with PT 1mg/ml  $\pm$  (A) AuNP 25 ug/ml (n=5); (B) AgNP 5 ug/ml (n=6); (C) TiO<sub>2</sub>NP 100 ug/ml (n=4); (D) ZnONP 25 ug/ml (n=5). Significance versus untreated biopsies is indicated above each column (\*p<0.05). Box plots represent median, 25<sup>th</sup>, and 75<sup>th</sup> percentiles. Whiskers indicate 5<sup>th</sup> and 95<sup>th</sup> percentiles.

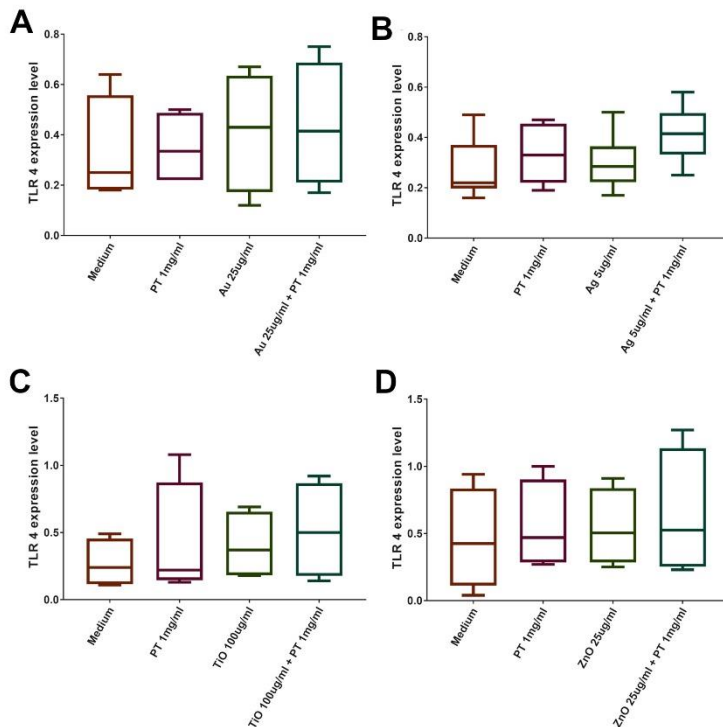

**Figure S4.** TLR4 expression in CeD patients on a GFD. Duodenal biopsies stimulated 4h with PT 1mg/ml  $\pm$  (A) AuNP 25 ug/ml (n=5); (B) AgNP 5 ug/ml (n=6); (C) TiO<sub>2</sub>NP 100 ug/ml (n=4); (D) ZnONP 25 ug/ml (n=5). Significance versus

untreated biopsies is indicated above each column (\* $p < 0.05$ ). Box plots represent median, 25<sup>th</sup>, and 75<sup>th</sup> percentiles. Whiskers indicate 5<sup>th</sup> and 95<sup>th</sup> percentiles.
